# Supplementary material for: Comparative effectiveness of ACE inhibitors and angiotensin receptor blockers in patients with prior myocardial infarction
Source: PubMed Central journal article supplement — Open Heart. 2019 May 4;6(1):e001010. doi: 10.1136/openhrt-2019-001010 (PMC6546192; doi:10.1136/openhrt-2019-001010), 2019-05-04
Supplement: openhrt-2019-001010supp001.pdf [file openhrt-2019-001010supp001.pdf]

**Appendix Table 1. Most commonly prescribed ACE inhibitors and ARBs in patients with myocardial infarction**

| <b>Drug Class</b> | <b>Drug</b> | <b>n</b>    | <b>%</b> |
|-------------------|-------------|-------------|----------|
| <b>ACEI</b>       | Ramipril    | 28,313      | 67.2     |
|                   | Perindopril | 9,174       | 21.8     |
|                   | Lisinopril  | 1,316       | 3.1      |
|                   | Enalapril   | 1,238       | 2.9      |
|                   | Quinapril   | 792         | 1.9      |
|                   | Other       | 1,293       | 3.1      |
|                   | <b>ARB</b>  | Candesartan | 4,407    |
| Valsartan         |             | 4,000       | 23.2     |
| Irbesartan        |             | 3,262       | 18.9     |
| Telmisartan       |             | 2,976       | 17.3     |
| Losartan          |             | 2,129       | 12.4     |
| Other             |             | 453         | 2.6      |

**Appendix Table 2. Baseline characteristics prior to propensity score weighting**

|                                          | <b>All patients<br/>(%)</b> | <b>ACEIs<br/>(%)</b> | <b>ARBs<br/>(%)</b> |
|------------------------------------------|-----------------------------|----------------------|---------------------|
| <b>Characteristics</b>                   | <b>N=59,353</b>             | <b>N=42,126</b>      | <b>N=17,227</b>     |
| Age (years), mean $\pm$ SD               | 77.0 $\pm$ 7.9              | 76.9 $\pm$ 8.0       | 77.4 $\pm$ 7.7      |
| Men                                      | 59.6                        | 63.4                 | 50.4                |
| Rural resident                           | 15.7                        | 16.4                 | 14.0                |
| Last MI (months), mean $\pm$ SD          | 53.7 $\pm$ 35.6             | 53.4 $\pm$ 35.8      | 54.3 $\pm$ 35.1     |
| <b>Cardiovascular comorbidities</b>      |                             |                      |                     |
| Chronic ischemic heart disease           | 82.4                        | 82.5                 | 82.3                |
| Angina                                   | 25.0                        | 24.1                 | 27.3                |
| Atrial fibrillation/flutter              | 22.2                        | 21.9                 | 22.9                |
| Diabetes                                 | 45.4                        | 43.9                 | 49.2                |
| Heart failure                            | 26.0                        | 25.6                 | 27.0                |
| Hypertension                             | 90.4                        | 88.6                 | 94.7                |
| Dyslipidemia                             | 56.3                        | 55.3                 | 58.6                |
| Peripheral vascular disease              | 7.1                         | 7.4                  | 6.5                 |
| Cerebrovascular disease                  | 9.4                         | 9.5                  | 9.1                 |
| Stroke/Transient ischemic attack         | 7.7                         | 7.7                  | 7.7                 |
| Shock                                    | 5.0                         | 5.1                  | 4.6                 |
| <b>Medical comorbidities</b>             |                             |                      |                     |
| Renal disease                            | 9.1                         | 8.3                  | 11.3                |
| Cancer                                   | 11.1                        | 11.1                 | 11.1                |
| Chronic obstructive pulmonary disease    | 13.3                        | 13.0                 | 14.2                |
| Liver disease                            | 1.0                         | 1.0                  | 1.2                 |
| Peptic ulcer disease                     | 4.0                         | 3.8                  | 4.3                 |
| Anemia/blood disease                     | 22.0                        | 21.2                 | 24.0                |
| Charlson score, mean $\pm$ SD            | 2.9 $\pm$ 2.0               | 2.8 $\pm$ 2.0        | 3.0 $\pm$ 2.0       |
| <b>Prior cardiac invasive procedures</b> |                             |                      |                     |
| Percutaneous coronary intervention       | 46.8                        | 47.1                 | 46.0                |
| Coronary artery bypass grafting          | 20.4                        | 20.4                 | 20.3                |
| Coronary catheterization                 | 80.7                        | 80.6                 | 80.8                |
| <b>Medication use</b>                    |                             |                      |                     |
| Statins                                  | 84.0                        | 84.8                 | 82.2                |
| Beta blocker                             | 70.3                        | 71.0                 | 68.7                |
| Diuretics                                | 43.8                        | 40.1                 | 52.6                |
| Clopidogrel                              | 31.4                        | 31.8                 | 30.5                |
| Calcium channel blockers                 | 30.5                        | 27.5                 | 37.8                |
| Nitrates                                 | 19.2                        | 19.0                 | 19.7                |
| Warfarin                                 | 12.3                        | 12.3                 | 12.2                |
| Spirolactone                             | 4.9                         | 5.0                  | 4.8                 |

Abbreviations: ACEI, angiotensin converting enzyme inhibitor; ARB, angiotensin receptor blocker; MI, myocardial infarction; SD, standard deviation.
